# Supplementary material for: Negative Elongation Factor (NELF) Inhibits Premature Granulocytic Development in Zebrafish
Source: MDPI journal article supplement (doi:10.3390/ijms23073833), 2022-03-30
Supplement: s1 [file s1]

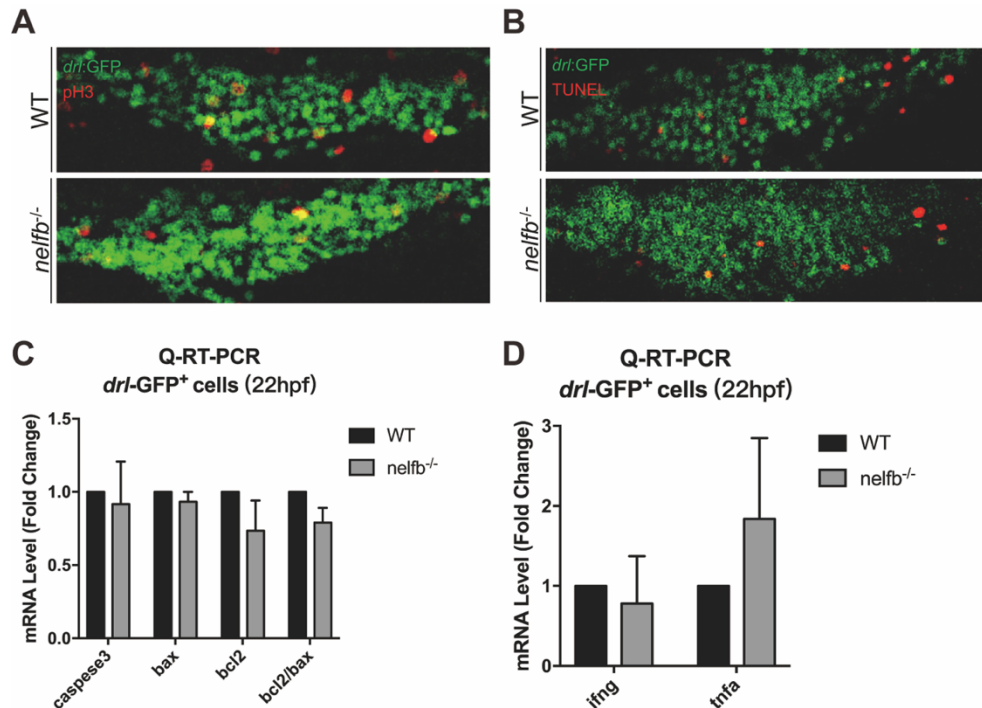

**Supplementary Figure S1. Proliferation, apoptosis and inflammatory cytokine expression of hematopoietic cells in *nelfb*<sup>-/-</sup> mutants are normal compared with WT siblings.**

(A) Double immunofluorescent staining for GFP (green) and phosphorylated histone H3 (pH3, red) in Tg(*drl:GFP*) embryos. (B) TUNEL staining in PBI of Tg(*drl:GFP*) embryos. (C) Q-RT-PCR analysis of apoptosis-related gene expression in sorted *drl-GFP*<sup>+</sup> cells in *nelfb*<sup>-/-</sup> and WT embryos at 22 hpf. (D) Q-RT-PCR analysis of inflammatory gene expression in sorted *drl-GFP*<sup>+</sup> cells in *nelfb*<sup>-/-</sup> and WT embryos at 22 hpf. PBI, posterior blood island.

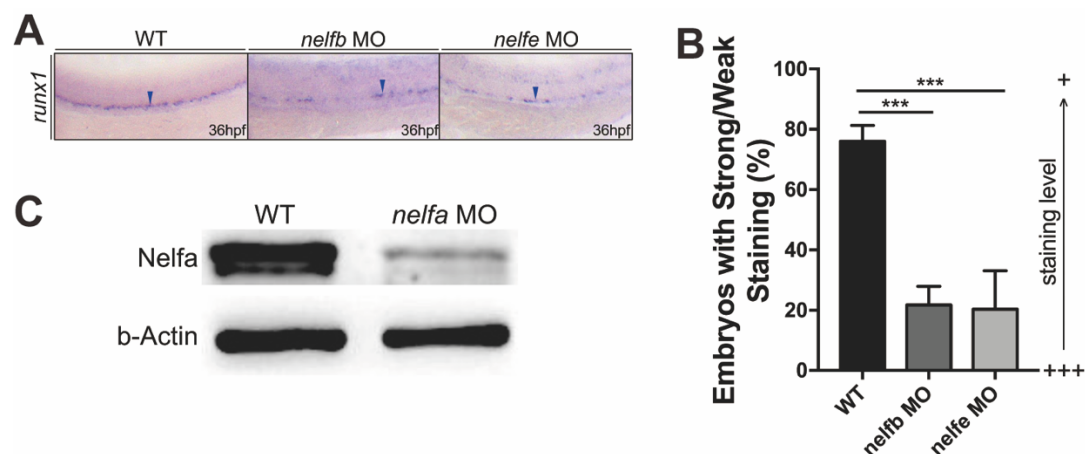

**Supplementary Figure S2. *nelfa*, *nelfb* and *nelfe* morpholino knock-down efficiency.**

(A) WISH for *runx1* in WT, *nelfb* or *nelfe* morphants at 36 hpf. (B) Quantification of WISH results in A (30-50 embryos per group). All results are presented as the mean  $\pm$  SD from three independent experiments (t test, \*\*\* for  $p < 0.001$ ). (C) Western blot of Nelfa from WT and *nelfa* morphants at 22 hpf. B-Actin serves as a loading control.

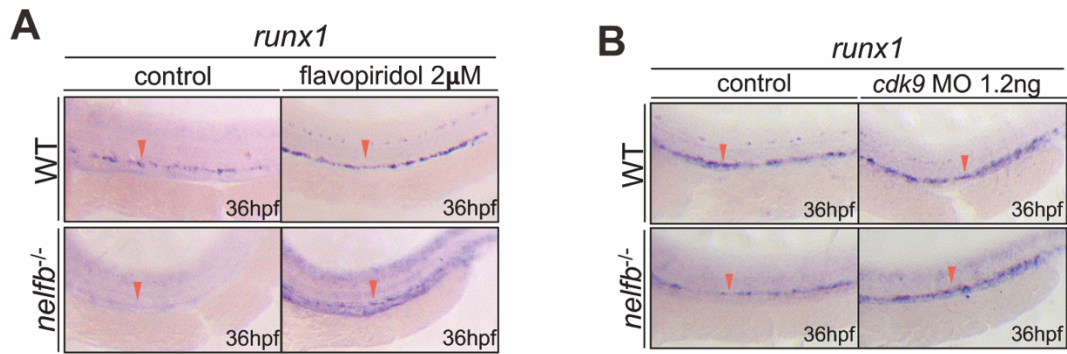

**Supplementary Figure S3. CDK9 inhibition promotes HSC development.**

(A, B) WISH for *runx1* at 36 hpf in wildtype and *nelfb*<sup>-/-</sup> embryos treated with flavopiridol or injected with 1.2 ng of *cdk9* MO, respectively. Orange arrowheads indicate AGM region.

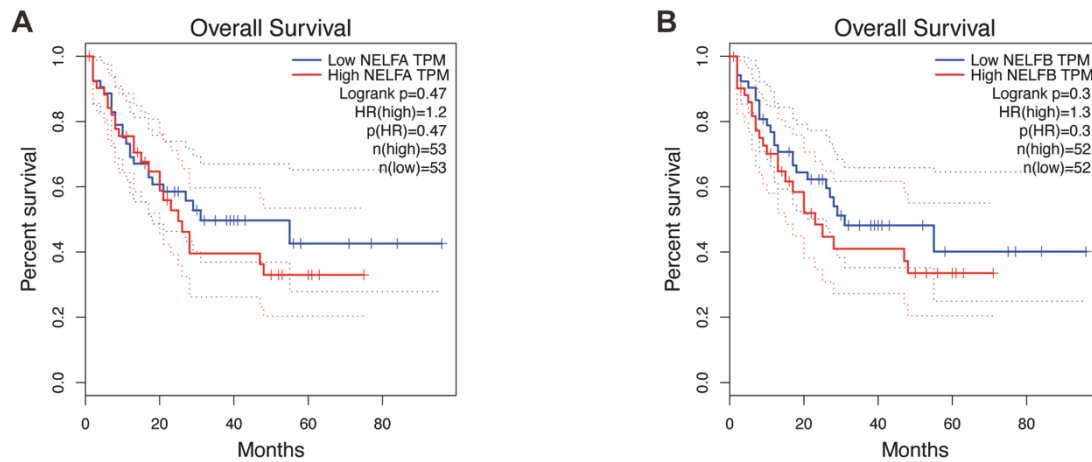

**Supplementary Figure S4. Low NELF expression elevate AML patients' overall survival rate**

(A, B) Overall survival (OS) analysis based on low- or high-expression of NELFA (A) or NELFB (B) by GEPIA (<http://gepia.cancer-pku.cn>) [1]

**Supplementary Table S1. Primers for *nelfb*<sup>-/-</sup> genotyping**

| primer           | sequence (5'→3')       |
|------------------|------------------------|
| sense primer     | ACAGACGGAAAATGGCATATTG |
| antisense primer | TTCACCTGTCCTCCTCCTTG   |

**Supplementary Table S2. Primers for Q-RT-PCR**

| gene           | sense primer (5'→3')    | antisense primer (5'→3') |
|----------------|-------------------------|--------------------------|
| actb (5' end)  | gatcttcactccccttgttca   | ataccggagccgttgtca       |
| actb (3' end)  | cctctcttgctcctccacc     | actcctgcttgctgatccac     |
| scl (5' end)   | cggtagacctcggatgagaag   | tcagcggaaattgctcggat     |
| scl (3' end)   | tcagcggaaattgctcggat    | ttgctaggatacatcccatactgt |
| pu.1 (5' end)  | ccactgtcagggcaggttac    | actcacgcaccttatcacgt     |
| pu.1 (3' end)  | caacaggaggagagcatggta   | tgttccttttctcgatccac     |
| mpx (5' end)   | agcacaacttactctgagcttca | cagcccaccacaaaaagaaaagt  |
| mpx (3' end)   | tcgagccttggaagagact     | cctgctacaccctgtggac      |
| mfap4 (5' end) | gaaccgagaactgtgtcct     | gagtctcgtgctctgtgtca     |
| mfap4 (3' end) | tatcgccgttgagagacta     | tgaacttctgtggcgtgtc      |
| gata1 (5' end) | gataagcaagcaaacagcg     | agaggagtctccatctgca      |
| gata1 (3' end) | tgagactttcgccacctga     | cagtccacaagcattacagagg   |
| runx1          | cgtcttcacaaacctctctcaa  | gctttactgtctcatccggct    |
| cmyb           | tcgccagcttctacaaa       | cagggttgaggactttctgc     |
| rag1           | tgagagctgggaatgaacaca   | ccgtgcggtacatcttgtga     |
| nelfa          | tgatcacgagaaaaccctg     | aaacactgtgtccaccagcat    |
| nelfb          | aaggtgctgccgacttacat    | tccttcaccgactcactgc      |
| nelfe          | gaatcagcagaccaggctgt    | gagaagcccagacagatttcc    |

**Supplementary Table S3. Morpholino Sequences**

| MO        | sequence (5'→3')          | reference    |
|-----------|---------------------------|--------------|
| nelfa-ATG | CGCTCTCCCTCATCGACGCCATCTT | this article |
| nelfb-ATG | CCGGCGAACATTTTCACACGCTCTC | [2]          |
| nelfe-ATG | AACTGGGAAATATTGCCATTTTGC  | [2]          |
| cdk9-spl  | ACACACAAACATCAAATACTCACCC | [2]          |

## Supplementary Methods

### *TUNEL immunostaining*

The 22hpf Tg(*drl:GFP*) embryos were fixed in 4% PFA overnight at 4°C and dehydrated in 100% methanol at -20°C over 30 minutes. Further processing of embryos was conducted according to the previous article [3]. For analysis, the embryos were mounted in 1% low-melt agarose and imaged under a confocal microscope Leica SP8 microsystems (Leica, Heidelberg, DE, Germany).

### *Phosphorylated Histone 3 Immunostaining*

The 22hpf Tg(*drl:GFP*) embryos were fixed in 4% PFA + 1% DMSO in 0.1M phosphate buffer (0.081M Na<sub>2</sub>HPO<sub>4</sub>, 0.014M NaH<sub>2</sub>PO<sub>4</sub>, pH7.4) overnight at 4°C. Embryos were dehydrated in 100% methanol at -20°C overnight after being washed with 0.1M phosphate buffer for 3 times. After digestion with pre-chilled acetone at -20°C for 15 minutes, the embryos were washed with incubation buffer (0.1M phosphate buffer + 0.2%BSA + 0.5%Triton-X) 15 minutes for 3 times and incubated with phosphorylated histone 3 primary antibody (#3377, CST) overnight at 4°C. The embryos were re-washed with incubation buffer 15 minutes for 3 times and incubated with coralite594-conjugated secondary antibody (SA00013-4, Proteintech) at room temperature for 4 hours.

The embryos were mounted in 1% low-melt agarose and imaged under a confocal microscope Leica SP8 microsystems (Leica, Heidelberg, DE, Germany) for analysis.

### *Westernblot*

22 hpf embryos were dechorionated. Whole embryos were collected except yolk and treated with lysis buffer (RIPA lysis buffer (P0013B Beyotime Biotechnology, China) + 1mM PMSF (ST506 Beyotime Biotechnology, China)) on ice for 30 minutes to extract protein. Antibodies targeting b-Actin (66009-1, Proteintech, China) and NELFA (10456-1-AP, Proteintech, China) were used as the primary antibodies.

## Reference

1. Wu, D., et al., *Pharmacological inhibition of dihydroorotate dehydrogenase induces apoptosis and differentiation in acute myeloid leukemia cells*. *Haematologica*, 2018. **103**(9): p. 1472-1483.
2. Yang, Q., et al., *RNA polymerase II pausing modulates hematopoietic stem cell emergence in zebrafish*. 2016. **128**(13): p. 1701.
3. Yu, S., et al., *BCAS2 is essential for hematopoietic stem and progenitor cell maintenance during zebrafish embryogenesis*. *Blood*, 2019. **133**(8): p. 805-815.
